# Supplementary material
Source: PubMed Central journal article supplement (PMC5075108)
Supplement: AAC.01576-16_zac011165660so1.pdf [file AAC.01576-16_zac011165660so1.pdf]

Prevalence of quinolone resistance in *Enterobacteriaceae* from Sierra Leone and the detection of *qnrB* pseudogenes and modified LexA binding sites.

**TABLE S1.** PCR primers and cycling conditions used in this study.

| Primer name     | Sequence (5' → 3') <sup>1</sup> | Target                 | Reference  | PCR conditions <sup>2</sup> |        |           |
|-----------------|---------------------------------|------------------------|------------|-----------------------------|--------|-----------|
|                 |                                 |                        |            | Annealing                   | Cycles | Extension |
| qnrAm-F         | AGAGGATTTCTCACGCCAGG            | <i>qnrA</i>            | (1)        | 53                          | 30     | 1         |
| qnrAm-R         | TGCCAGGCACAGATCTTGAC            |                        |            |                             |        |           |
| qnrBm-F         | GGMATHGAAATTCGCCACTG            | <i>qnrB</i>            | (2)        | 53                          | 30     | 1         |
| qnrBm-R         | TTTGCGYYCGCCAGTCGAA             |                        |            |                             |        |           |
| psp2            | AAATTTAAYCAGAAAAAGC             | <i>qnrB</i> -full ORF  | (3)        | 53                          | 30     | 1         |
| sc3             | GCTSARGAGAACAGCTATAC            |                        |            |                             |        |           |
| ds3             | ATGGCTGAAGTTGAGATTAT            |                        |            |                             |        |           |
| qnrC-F          | GGGTTGTACATTTATTGAATCG          | <i>qnrC</i>            | (4)        | 53                          | 30     | 1         |
| qnrC-R          | CACCTACCCATTTATTTTCA            |                        |            |                             |        |           |
| qnrD-F          | CGAGATCAATTTACGGGGAATA          | <i>qnrD</i>            | (5)        | 53                          | 30     | 1         |
| qnrD-R          | AACAAGCTGAAGCGCCTG              |                        |            |                             |        |           |
| qnrSm-F         | GCAAGTTCATTGAACAGGGT            | <i>qnrS</i>            | (1)        | 53                          | 30     | 1         |
| qnrSm-R         | TCTAAACCGTCGAGTTCGGCG           |                        |            |                             |        |           |
| qnrS_ext_fwd1   | GGGTTGTAATGTGTTGATGTAACAGG      | <i>qnrS</i> - full ORF | this study | 50                          | 40     | 2         |
| qnrS_ext_rev1   | CCCTATGTCTATTATTGCAAGGTTG       |                        |            |                             |        |           |
| qnrVC-F         | AATTTTAAGCGCTCAAACCTCCG         | <i>qnrVC</i>           | (6)        | 53                          | 30     | 1         |
| qnrVC-R         | TCCTGTTGCCACGAGCATATTTT         |                        |            |                             |        |           |
| aac(6)-Ib       | TTGCGATGCTCTATGAGTGGCTA         | <i>aac(6')</i> -Ib-cr  | (7)        | 53                          | 30     | 1         |
| aac(6)-Ib-ext-R | ACG TCC CCC TCG ATG GAA G       |                        | this study |                             |        |           |
| qepA-F          | AACTGCTTGAGCCCGTAGAT            | <i>qepA</i>            | (8)        | 50                          | 45     | 1         |
| qepA-R          | GTCTACGCCATGGACCTCAC            |                        |            |                             |        |           |
| oqxAB-F         | CTCGCAGCGTCTGTTACAG             | <i>oqxA/oqxB</i>       | this study | 50                          | 40     | 1         |
| oqxAB-R         | GAGACTGCTTCTGGGTGGTGATC         |                        |            |                             |        |           |
| gyrA-F          | GTACTTTACGCCATGAACGT            | <i>gyrA</i> (QRDR)     | (8)        | 50                          | 40     | 1         |
| gyrA-R          | TACCGTCATAGTTATCCACGA           |                        |            |                             |        |           |
| gyrA-alt-R      | ATCACTTCCGTCAGGTTGTGC           |                        | this study |                             |        |           |
| parC-F          | AATGAGCGATATGGCAGAGC            | <i>parC</i> (QRDR)     | (8)        | 50                          | 40     | 1         |
| parC-R          | TTGGCAGACGGGCAGGTAG             |                        |            |                             |        |           |
| parC-kleb1-R    | GCCAATTACGCAGGTTGTG             |                        | this study | 53                          | 40     | 2         |

<sup>1</sup> M = A or C; H = A or C or T; Y = C or T

<sup>2</sup> For all PCR amplifications the following general cycling program was used: the samples were denatured at 95°C for 2 min, followed by 30 to 45 cycles of denaturation at 95°C for 30 s, annealing at 50 to 60°C for 30 s, and extension at 72°C for 1 or 2 min. The table provides the actual values for – the annealing temperature in degrees Celsius (annealing), the number of cycles conducted (cycles) and the duration of extension part of the cycle in minutes (extension).

**TABLE S2.** Quinolone sensitivity phenotypes, PMQR genes and QRDR mutations.

| Isolate <sup>1</sup> | Identification               | Quinolone MIC <sup>2</sup> |            |            | PMQR genes detected <sup>3</sup>   | QRDR mutations <sup>4</sup> |       |       |       |
|----------------------|------------------------------|----------------------------|------------|------------|------------------------------------|-----------------------------|-------|-------|-------|
|                      |                              | ND                         | CIP        | MOX        |                                    | GyrA                        |       | ParC  |       |
|                      |                              |                            |            |            |                                    | Ser83                       | Asp87 | Ser80 | Glu84 |
| SL121                | <i>Escherichia coli</i>      | <u>≥256</u>                | <u>≥32</u> | <u>≥32</u> | <i>qepA1</i>                       | Leu                         | Asn   | Ile   |       |
| SL158                | <i>Escherichia coli</i>      | <u>≥256</u>                | <u>≥32</u> | <u>≥32</u> | <i>qepA1</i>                       | Leu                         | Asn   | Ile   |       |
| SL176                | <i>Escherichia coli</i>      | <u>≥256</u>                | <u>≥32</u> | <b>24</b>  | <i>qepA1</i>                       | Leu                         | Asn   | Ile   | Gly   |
| SL152                | <i>Escherichia coli</i>      | <u>≥256</u>                | 0.75       | 0.75       |                                    | Val                         |       | Arg   |       |
| SL169                | <i>Escherichia coli</i>      | <u>≥256</u>                | 0.38       | 0.5        |                                    | Leu                         |       |       |       |
| SL171                | <i>Escherichia coli</i>      | <u>≥256</u>                | 0.38       | 0.5        |                                    | Leu                         |       |       |       |
| SL178                | <i>Escherichia coli</i>      | <u>≥256</u>                | 0.25       | 0.25       |                                    | Leu                         |       |       |       |
| SL188                | <i>Escherichia coli</i>      | <u>≥256</u>                | 0.25       | 0.38       |                                    | Leu                         |       |       |       |
| SL115                | <i>Escherichia coli</i>      | 2                          | 0.016      | 0.064      |                                    |                             |       |       |       |
| SL125                | <i>Escherichia coli</i>      | 3                          | 0.016      | 0.094      |                                    |                             |       |       |       |
| SL133                | <i>Escherichia coli</i>      | 2                          | 0.016      | 0.047      |                                    |                             |       |       |       |
| SL137                | <i>Escherichia coli</i>      | 3                          | 0.016      | 0.064      |                                    |                             |       |       |       |
| SL159                | <i>Escherichia coli</i>      | 3                          | 0.012      | 0.19       |                                    |                             |       |       |       |
| SL162                | <i>Klebsiella pneumoniae</i> | <u>≥256</u>                | <b>12</b>  | <u>≥32</u> | <i>oqxAB</i>                       | Phe                         | Ala   | Ile   |       |
| SL108                | <i>Klebsiella pneumoniae</i> | <u>≥256</u>                | <b>4</b>   | <b>8</b>   | <i>oqxAB</i>                       | Ile                         |       | Ile   |       |
| SL116                | <i>Klebsiella pneumoniae</i> | <u>≥256</u>                | <b>4</b>   | <b>8</b>   | <i>oqxAB</i>                       | Ile                         |       | Ile   |       |
| SL163                | <i>Klebsiella pneumoniae</i> | <u>≥256</u>                | <b>3</b>   | <b>6</b>   | <i>oqxAB</i>                       | Ile                         |       | Ile   |       |
| SL164                | <i>Klebsiella pneumoniae</i> | <u>≥256</u>                | <b>2</b>   | <b>4</b>   | <i>oqxAB</i>                       | Ile                         |       | Ile   |       |
| SL165                | <i>Klebsiella pneumoniae</i> | <u>≥256</u>                | <b>3</b>   | <b>4</b>   | <i>oqxAB</i>                       | Ile                         |       | Ile   |       |
| SL185                | <i>Klebsiella pneumoniae</i> | <u>≥256</u>                | <u>≥32</u> | <b>12</b>  | <i>oqxAB, aac(6)-1b-cr, qnrB1d</i> | Ile                         |       | Ile   |       |
| SL186                | <i>Klebsiella pneumoniae</i> | <u>≥256</u>                | <b>4</b>   | 1.4        | <i>oqxAB</i>                       | Ile                         |       | Ile   |       |
| SL190                | <i>Klebsiella pneumoniae</i> | <u>≥256</u>                | <u>≥32</u> | <b>16</b>  | <i>oqxAB, aac(6)-1b-cr</i>         | Tyr                         | Ala   | Ile   |       |
| SL113                | <i>Klebsiella pneumoniae</i> | <b>24</b>                  | <b>2</b>   | <b>4</b>   | <i>oqxAB, aac(6)-1b-cr, qnrB1d</i> |                             |       |       |       |
| SL136                | <i>Klebsiella pneumoniae</i> | 3                          | 0.094      | 0.25       | <i>oqxAB</i>                       |                             |       |       |       |
| SL141                | <i>Klebsiella pneumoniae</i> | 6                          | 0.064      | 0.5        | <i>oqxAB</i>                       |                             |       |       |       |
| SL180                | <i>Klebsiella pneumoniae</i> | 8                          | 0.75       | 0.75       | <i>oqxAB, aac(6)-1b-cr, qnrB1d</i> |                             |       |       |       |

|           |                                       |             |            |            |                                                            |     |     |
|-----------|---------------------------------------|-------------|------------|------------|------------------------------------------------------------|-----|-----|
| SL183     | <i>Klebsiella pneumoniae</i>          | 3           | 0.032      | 0.094      | <i>oqxAB</i>                                               |     |     |
| SL196     | <i>Klebsiella pneumoniae</i>          | 12          | <b>3</b>   | 1          | <i>oqxAB, aac(6')-Ib-cr, qnrB1d</i>                        |     |     |
| SL513 (e) | <i>Klebsiella pneumoniae</i>          | 3           | 0.032      | 0.064      | <i>oqxAB</i>                                               |     |     |
| SL531 (e) | <i>Klebsiella pneumoniae</i>          | 3           | 0.032      | 0.094      | <i>oqxAB</i>                                               |     |     |
| SL179     | <i>Enterobacter cloacae</i>           | 16          | <b>3</b>   | 1          | <i>aac(6')-Ib-cr, qnrB1a</i>                               |     |     |
| SL182     | <i>Enterobacter cloacae</i>           | 3           | <b>1.5</b> | 0.75       | <i>aac(6')-Ib-cr, qnrB1a</i>                               |     |     |
| SL189     | <i>Enterobacter cloacae</i>           | 12          | 1          | 0.75       | <i>aac(6')-Ib-cr, qnrB1a</i>                               |     |     |
| SL199     | <i>Enterobacter cloacae</i>           | 16          | <b>1.5</b> | 0.75       | <i>aac(6')-Ib-cr, qnrB1a</i>                               |     |     |
| SL167     | <i>Enterobacter cloacae</i>           | <b>24</b>   | 0.75       | <b>4</b>   | <i>aac(6')-Ib-cr, qnrB1i</i>                               |     |     |
| SL168     | <i>Enterobacter cloacae</i>           | <b>24</b>   | 1          | <b>8</b>   | <i>aac(6')-Ib-cr, qnrB1i</i>                               |     |     |
| SL174     | <i>Enterobacter cloacae</i>           | 12          | 0.75       | 0.75       | <i>aac(6')-Ib-cr, qnrB1i</i>                               |     |     |
| SL175     | <i>Enterobacter cloacae</i>           | 12          | 0.75       | 0.75       | <i>aac(6')-Ib-cr, qnrB1i</i>                               |     |     |
| SL181     | <i>Enterobacter cloacae</i>           | 12          | 0.5        | 0.75       | <i>aac(6')-Ib-cr, qnrB1i</i>                               |     |     |
| SL195     | <i>Enterobacter cloacae</i>           | 12          | 0.38       | 1          | <i>aac(6')-Ib-cr, qnrB1i</i>                               |     |     |
| SL198     | <i>Enterobacter cloacae</i>           | 12          | 0.75       | 0.75       | <i>aac(6')-Ib-cr, qnrB1i</i>                               |     |     |
| SL203     | <i>Enterobacter cloacae</i>           | 12          | 1          | 0.75       | <i>aac(6')-Ib-cr, qnrB1i</i>                               |     |     |
| SL161     | <i>Enterobacter cloacae</i>           | <b>24</b>   | <b>3</b>   | <b>12</b>  | <i>oqxAB, aac(6')-Ib-cr, qnrB6</i>                         |     |     |
| SL160     | <i>Enterobacter cloacae</i>           | 6           | 0.125      | 2          | <i>qnrS1</i>                                               | Thr |     |
| SL192     | <i>Enterobacter cloacae</i>           | <u>≥256</u> | <b>1.5</b> | <b>16</b>  | <i>qnrS1</i>                                               | Ile | Ile |
| SL512 (e) | <i>Enterobacter cloacae</i>           | 6           | 0.19       | 0.5        | <i>qnrS1</i>                                               |     |     |
| SL184     | <i>Enterobacter sp./Leclercia sp.</i> | <u>≥256</u> | <u>≥32</u> | <b>6</b>   | <i>aac(6')-Ib-cr, qnrB1a</i>                               | Ile | Ile |
| SL191     | <i>Enterobacter sp./Leclercia sp.</i> | <u>≥256</u> | <u>≥32</u> | <b>6</b>   | <i>aac(6')-Ib-cr, qnrB1a</i>                               | Ile | Ile |
| SL201     | <i>Enterobacter sp./Leclercia sp.</i> | <u>≥256</u> | <u>≥32</u> | <b>12</b>  | <i>aac(6')-Ib-cr, qnrB1a</i>                               | Ile | Ile |
| SL204     | <i>Enterobacter sp./Leclercia sp.</i> | <u>≥256</u> | <u>≥32</u> | <b>6</b>   | <i>aac(6')-Ib-cr, qnrB1a</i>                               | Ile | Ile |
| SL129     | <i>Citrobacter freundii</i>           | <u>≥256</u> | <u>≥32</u> | <u>≥32</u> | <i>aac(6')-Ib-cr, qnrA1, Δ<sup>1</sup>qnrB<sup>5</sup></i> | Ile | Ile |
| SL156     | <i>Citrobacter freundii</i>           | <u>≥256</u> | <u>≥32</u> | <u>≥32</u> | <i>aac(6')-Ib-cr, qnrB82, Δ<sup>3</sup>qnrB, qnrS1</i>     | Ile | Ile |
| SL157     | <i>Citrobacter freundii</i>           | <u>≥256</u> | <u>≥32</u> | <u>≥32</u> | <i>aac(6')-Ib-cr, qnrB81, Δ<sup>3</sup>qnrB, qnrS1</i>     | Ile | Ile |
| SL187     | <i>Citrobacter freundii</i>           | <u>≥256</u> | <u>≥32</u> | <b>12</b>  | <i>aac(6')-Ib-cr, qnrB1a, Δ<sup>3</sup>qnrB</i>            | Ile | Ile |
| SL197     | <i>Citrobacter freundii</i>           | <u>≥256</u> | <u>≥32</u> | <b>16</b>  | <i>aac(6')-Ib-cr, qnrB1a, Δ<sup>3</sup>qnrB</i>            | Ile | Ile |
| SL150     | <i>Citrobacter freundii</i>           | <u>≥256</u> | <u>≥32</u> | <u>≥32</u> | <i>aac(6')-Ib-cr, qnrB1d, Δ<sup>1</sup>qnrB</i>            | Ile | Ile |
| SL172     | <i>Citrobacter freundii</i>           | <u>≥256</u> | <u>≥32</u> | <u>≥32</u> | <i>aac(6')-Ib-cr, qnrB1d, Δ<sup>1</sup>qnrB</i>            | Ile | Ile |

|           |                              |             |            |            |                                                       |     |     |     |
|-----------|------------------------------|-------------|------------|------------|-------------------------------------------------------|-----|-----|-----|
| SL200     | <i>Citrobacter freundii</i>  | <u>≥256</u> | <u>≥32</u> | <u>≥32</u> | <i>aac(6')-Ib-cr, qnrB1d, Δ<sup>1</sup>qnrB</i>       | Ile |     | Ile |
| SL202     | <i>Citrobacter freundii</i>  | <u>≥256</u> | <u>≥32</u> | <u>≥32</u> | <i>aac(6')-Ib-cr, qnrB1d, Δ<sup>1</sup>qnrB</i>       | Ile |     | Ile |
| SL205     | <i>Citrobacter freundii</i>  | <u>≥256</u> | <u>≥32</u> | <u>≥32</u> | <i>aac(6')-Ib-cr, qnrB1d, Δ<sup>1</sup>qnrB</i>       | Ile |     | Ile |
| SL154     | <i>Citrobacter freundii</i>  | <u>≥256</u> | <u>≥32</u> | <u>≥32</u> | <i>qnrB12</i>                                         | Ile | Tyr | Ile |
| SL155     | <i>Citrobacter freundii</i>  | <u>≥256</u> | <u>≥32</u> | <u>≥32</u> | <i>qnrB12</i>                                         | Ile | Tyr | Ile |
| SL194     | <i>Citrobacter freundii</i>  | <u>≥256</u> | <u>≥32</u> | <u>≥32</u> | <i>qnrB12</i>                                         | Ile | Tyr | Ile |
| SL124     | <i>Citrobacter freundii</i>  | <u>≥256</u> | <b>12</b>  | <u>≥32</u> | <i>aac(6')-Ib-cr, qnrB6, Δ<sup>2</sup>qnrB, qnrS1</i> | Ile |     |     |
| SL127     | <i>Citrobacter freundii</i>  | <u>≥256</u> | <b>12</b>  | <u>≥32</u> | <i>aac(6')-Ib-cr, qnrB6, Δ<sup>2</sup>qnrB, qnrS1</i> | Ile |     |     |
| SL151     | <i>Citrobacter freundii</i>  | <u>≥256</u> | <b>16</b>  | <u>≥32</u> | <i>aac(6')-Ib-cr, qnrB6, Δ<sup>2</sup>qnrB, qnrS1</i> | Ile |     |     |
| SL153     | <i>Citrobacter freundii</i>  | <u>≥256</u> | <b>12</b>  | <u>≥32</u> | <i>aac(6')-Ib-cr, qnrB6, Δ<sup>2</sup>qnrB, qnrS1</i> | Ile |     |     |
| SL170     | <i>Citrobacter freundii</i>  | <u>≥256</u> | <b>12</b>  | <u>≥32</u> | <i>aac(6')-Ib-cr, qnrB6, Δ<sup>2</sup>qnrB, qnrS1</i> | Ile |     |     |
| SL173     | <i>Citrobacter freundii</i>  | <u>≥256</u> | <b>12</b>  | <b>12</b>  | <i>aac(6')-Ib-cr, qnrB6, Δ<sup>2</sup>qnrB, qnrS1</i> | Ile |     |     |
| SL177     | <i>Citrobacter freundii</i>  | <u>≥256</u> | <b>16</b>  | <b>6</b>   | <i>aac(6')-Ib-cr, qnrB6, Δ<sup>2</sup>qnrB, qnrS1</i> | Ile |     |     |
| SL193     | <i>Citrobacter freundii</i>  | <u>≥256</u> | <b>16</b>  | <b>12</b>  | <i>aac(6')-Ib-cr, qnrB6, Δ<sup>2</sup>qnrB, qnrS1</i> | Ile |     |     |
| SL122     | <i>Citrobacter freundii</i>  | <u>≥256</u> | <b>8</b>   | <b>16</b>  | <i>aac(6')-Ib-cr, Δ<sup>2</sup>qnrB, qnrS1</i>        | Ile |     |     |
| SL166     | <i>Escherichia hermannii</i> | 12          | <b>3</b>   | 2          | <i>aac(6')-Ib-cr, qnrB1a, qnrS1</i>                   |     |     |     |
| SL522 (e) | <i>Pantoea dispersa</i>      | 2           | 0.016      | 0.047      |                                                       | ND  | ND  | ND  |

<sup>1</sup> All of the isolates were cultured from outpatient urine samples collected at Mercy Hospital, Bo Sierra Leone with the exception of SL513, SL531, SL512 and SL522 that were recovered from the hospital environment (e).

<sup>2</sup> Minimum inhibitory concentrations (MIC) were measured using E-test assays. CIP – ciprofloxacin, ND – nalidixic acid, MOX – moxifloxacin. The values in bold font only designate intermediate resistance whereas those that are in bold font and underlined denote high clinical resistance. All MIC values in regular font denote clinical sensitivity. The isolates in the table were listed in the order of decreasing MIC values.

<sup>3</sup> The presence of the following PMQR genes was tested: *qnrA, qnrB, qnrC, qnrD, qnrS, qnrVC, aac(6')-Ib-cr, qepA*, and *oqxAB*.

<sup>4</sup> Substitutions were deduced via *in silico* translation of the obtained DNA sequence. The position numbers are based on *E. coli* GyrA and ParC protein sequences.

<sup>5</sup> The  $\Delta^1$ *qnrB* sequence is identical to that previously described in the chromosome of *C. freundii* ATCC 43864 (9) and the sequences of  $\Delta^2$ *qnrB* and  $\Delta^3$ *qnrB* differ from  $\Delta^1$ *qnrB* by several point mutations.

## References

1. **Cattoir V, Poirel L, Rotimi V, Soussy CJ, Nordmann P.** 2007. Multiplex PCR for detection of plasmid-mediated quinolone resistance *qnr* genes in ESBL-producing enterobacterial isolates. *J Antimicrob Chemother* **60**:394-397.
2. **Cattoir V, Weill FX, Poirel L, Fabre L, Soussy CJ, Nordmann P.** 2007. Prevalence of *qnr* genes in *Salmonella* in France. *J Antimicrob Chemother* **59**:751-754.
3. **Jacoby GA, Griffin CM, Hooper DC.** 2011. *Citrobacter* spp. as a source of *qnrB* Alleles. *Antimicrob Agents Chemother* **55**:4979-4984.
4. **Kim HB, Park CH, Kim CJ, Kim EC, Jacoby GA, Hooper DC.** 2009. Prevalence of plasmid-mediated quinolone resistance determinants over a 9-year period. *Antimicrob Agents Chemother* **53**:639-645.
5. **Cavaco LM, Hasman H, Xia S, Aarestrup FM.** 2009. *qnrD*, a novel gene conferring transferable quinolone resistance in *Salmonella enterica* serovar Kentucky and Bovismorbificans strains of human origin. *Antimicrob Agents Chemother* **53**:603-608.
6. **Kim HB, Wang M, Ahmed S, Park CH, LaRocque RC, Faruque AS, Salam MA, Khan WA, Qadri F, Calderwood SB, Jacoby GA, Hooper DC.** 2010. Transferable quinolone resistance in *Vibrio cholerae*. *Antimicrob Agents Chemother* **54**:799-803.
7. **Wareham DW, Umoren I, Khanna P, Gordon NC.** 2010. Allele-specific polymerase chain reaction (PCR) for rapid detection of the *aac(6')-Ib-cr* quinolone resistance gene. *Int J Antimicrob Agents* **36**:476-477.
8. **Wasył D, Hozowski A, Zajac M.** 2014. Prevalence and characterisation of quinolone resistance mechanisms in *Salmonella* spp. *Vet Microbiol* **171**:307-314.
9. **Saga T, Sabtcheva S, Mitsutake K, Ishii Y, Tateda K, Yamaguchi K, Kaku M.** 2013. Characterization of *qnrB*-like genes in *Citrobacter* species of the American Type Culture Collection. *Antimicrob Agents Chemother* **57**:2863-2866.
